# Supplementary material for: Brachytherapy Approach Using 177Lu Conjugated Gold Nanostars and Evaluation of Biodistribution, Tumor Retention, Dosimetry and Therapeutic Efficacy in Head and Neck Tumor Model
Source: MDPI journal article supplement (doi:10.3390/pharmaceutics13111903), 2021-11-09
Supplement: s1 [file s1]

## Supplementary Materials

# Brachytherapy Approach Using $^{177}\text{Lu}$ Conjugated Gold Nanostars and Evaluation of Biodistribution, Tumor Retention, Dosimetry and Therapeutic Efficacy in Head and Neck Tumor Model

Min-Ying Lin <sup>1,†</sup>, Hsin-Hua Hsieh <sup>1,†</sup>, Jyh-Cheng Chen <sup>1</sup>, Chuan-Lin Chen <sup>1</sup>, Nin-Chu Sheu <sup>1</sup>, Wen-Sheng Huang <sup>2</sup>, Shinn-Ying Ho <sup>3</sup>, Ting-Wen Chen <sup>3,4</sup>, Yi-Jang Lee <sup>1,5,\*</sup> and Chun-Yi Wu <sup>1,\*</sup>

<sup>1</sup> Department of Biomedical Imaging and Radiological Sciences, National Yang Ming Chiao Tung University, Taipei Branch, Taipei 112, Taiwan; milo841120.be09@nycu.edu.tw (M.-Y.L.); alexa.be09@nycu.edu.tw (H.-H.H.); jcchen@ym.edu.tw (J.-C.C.); clchen2@ym.edu.tw (C.-L.C.); mir870106.y@nycu.edu.tw (N.-C.S.)

<sup>2</sup> Department of Nuclear Medicine, Taipei Medical University Hospital, Taipei 11031, Taiwan; wshuang01@gmail.com

<sup>3</sup> Institute of Bioinformatics and Systems Biology, National Yang Ming Chiao Tung University, Hsinchu Branch, Hsinchu 30068, Taiwan; syho@nctu.edu.tw (S.-Y.H.); dodochen@nctu.edu.tw (T.-W.C.)

<sup>4</sup> Department of Biological Science and Technology, National Yang Ming Chiao Tung University, Hsinchu Branch, Hsinchu 30068, Taiwan

<sup>5</sup> Cancer Progression Research Center, National Yang Ming Chiao Tung University, Taipei Branch, Taipei 112, Taiwan

\* Correspondence: yjlee2@nycu.edu.tw (Y.-J.L.); chunyiwu@nycu.edu.tw (C.-Y.W.); Tel.: +886-2-28267189 (Y.-J.L.); +886-2-28267215 (C.-Y.W.)

† These authors contributed equally.

**Citation:** Lin, M.-Y.; Hsieh, H.-H.; Chen, J.-C.; Chen, C.-L.; Sheu, N.-C.; Huang, W.-S.; Ho, S.-Y.; Chen, T.-W.; Lee, Y.-J.; Wu, C.-Y. Brachytherapy Approach Using  $^{177}\text{Lu}$  Conjugated Gold Nanostars and Evaluation of Biodistribution, Tumor Retention, Dosimetry and Therapeutic Efficacy in Head and Neck Tumor Model. *Pharmaceutics* **2021**, *13*, 1903. <https://doi.org/10.3390/pharmaceutics13111903>

Academic Editors: Cristina Mariana Uritu, Gabriela Dumitrita Stanciu and Luminita Marin

Received: 8 October 2021

Accepted: 5 November

Published: 9 November 2021

**Publisher's Note:** MDPI stays neutral with regard to jurisdictional claims in published maps and institutional affiliations.

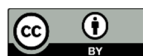

**Copyright:** © 2021 by the authors. Licensee MDPI, Basel, Switzerland. This article is an open access article distributed under the terms and conditions of the Creative Commons Attribution (CC BY) license (<http://creativecommons.org/licenses/by/4.0/>).

**Table S1.** Biodistribution of intravenously injection of  $^{177}\text{Lu}$ -DTPA-AuNS in HNSCC orthotopic tumor model<sup>a</sup>.

| Organs <sup>b</sup> | 24 h        | 48 h       |
|---------------------|-------------|------------|
| Blood               | 0.13±0.00   | 0.04±0.00  |
| Heart               | 0.25±0.07   | 0.16±0.04  |
| Lung                | 0.52±0.27   | 0.93±0.97  |
| Liver               | 50.66±13.84 | 45.58±2.47 |
| Stomach             | 0.64±0.25   | 0.33±0.13  |
| Small int.          | 2.03±0.89   | 1.15±0.46  |
| Large int.          | 0.49±0.15   | 0.30±0.06  |
| Pancreas            | 0.24±0.10   | 0.43±0.14  |
| Spleen              | 14.89±1.60  | 24.32±3.53 |
| Kidney              | 6.22±1.21   | 4.42±0.20  |
| Muscle              | 0.09±0.04   | 0.07±0.05  |
| Tumor               | 1.17±0.13   | 0.59±0.36  |
| Bone                | 0.52±0.09   | 0.66±0.14  |
| Bone Marrow         | 2.20±0.23   | 3.38±0.68  |
| Brain               | 0.01±0.00   | 0.01±0.01  |
| T/M                 | 14.30±4.86  | 7.90±0.06  |
| T/B                 | 8.84±1.22   | 14.52±9.77 |

a. Unit: percent of injection dose/gram of organ or tissue (%ID/g).

b. T/M: tumor-to-muscle; T/B tumor-to-blood ratio.

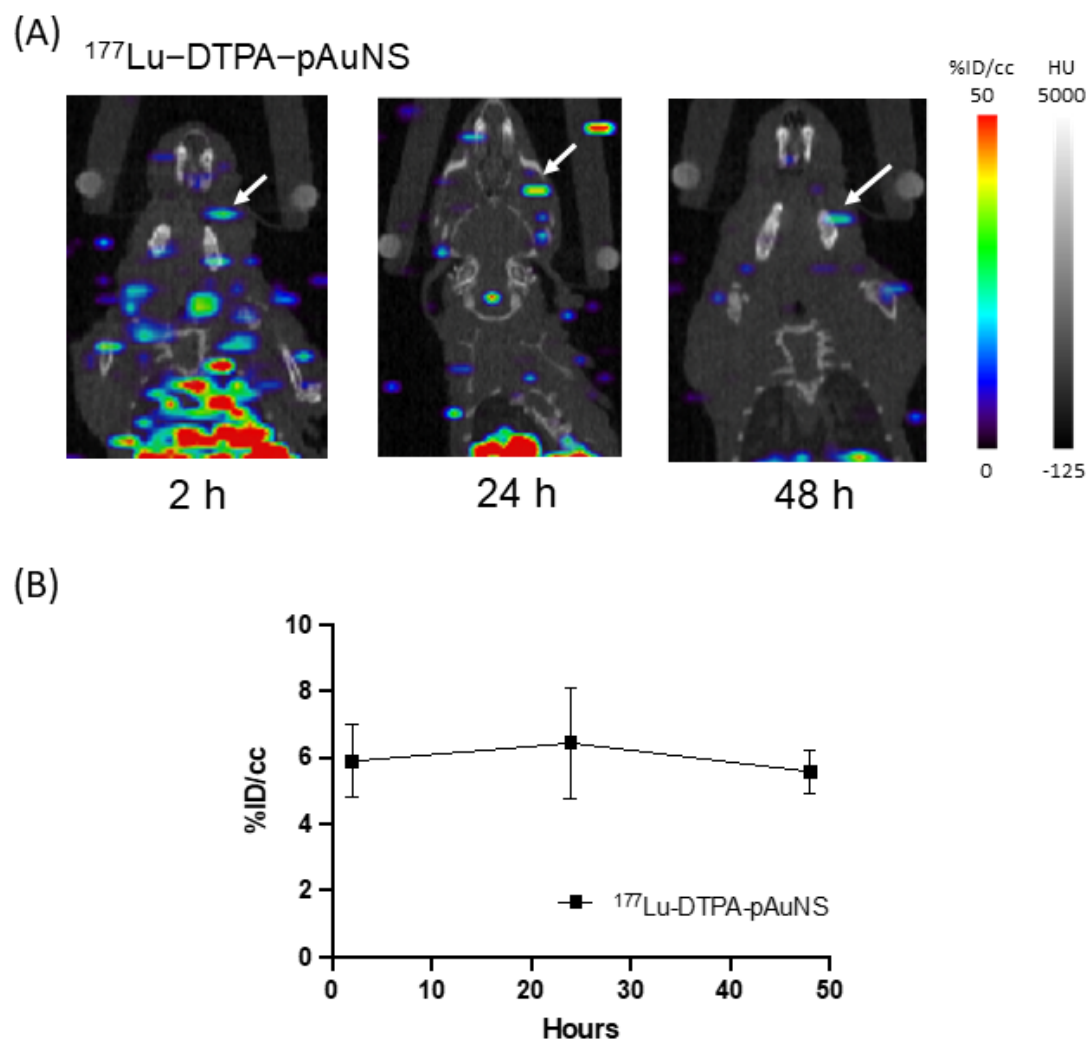

**Figure S1.** Intravenously injection of  $^{177}\text{Lu}$ -DTPA-pAuNS in HNSCC orthotopic tumor model. (A)  $\mu\text{SPECT/CT}$  imaging of  $^{177}\text{Lu}$ -DTPA-pAuNS. (B) The activity of the tumor area at different time points.

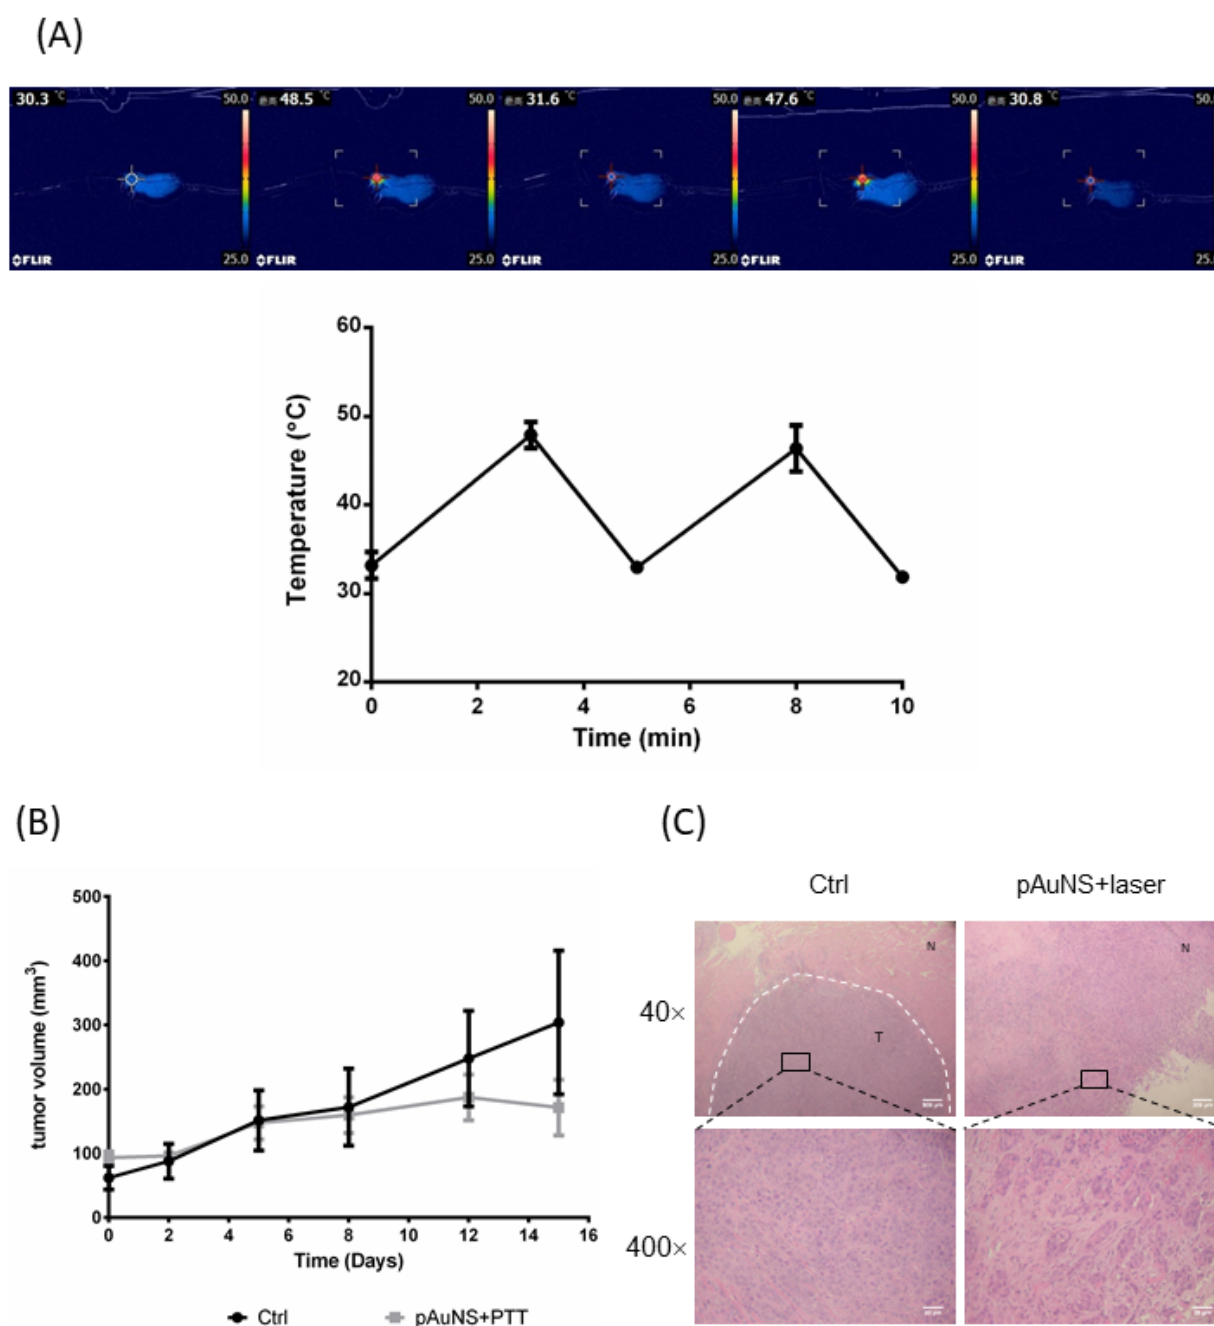

**Figure S2.** Intratumorally delivered pAuNS-mediated photothermal therapy. (A) Thermal imaging of pAuNS-mediated photothermal therapy (PTT) showing the surface temperature of the tumor during laser irradiation. (B) The tumor volume curves of the mice received pAuNS-mediated PTT and controls. (C) H&E staining of residual masses receiving laser alone (left column) and pAuNS-mediated PTT (right column). The nuclei and the cytoplasm were stained with hematoxylin (blue) and eosin (red). T: tumor; N: non-tumoral surrounding tissues.
